# Supplementary material
Source: publisher site journal article supplement (https://www.spandidos-publications.com/2447/downloadSupplementary)

(C) Representative dot plots of RD cells with intracellular CUR fluorescence in the respective channels. CUR, curcumin.

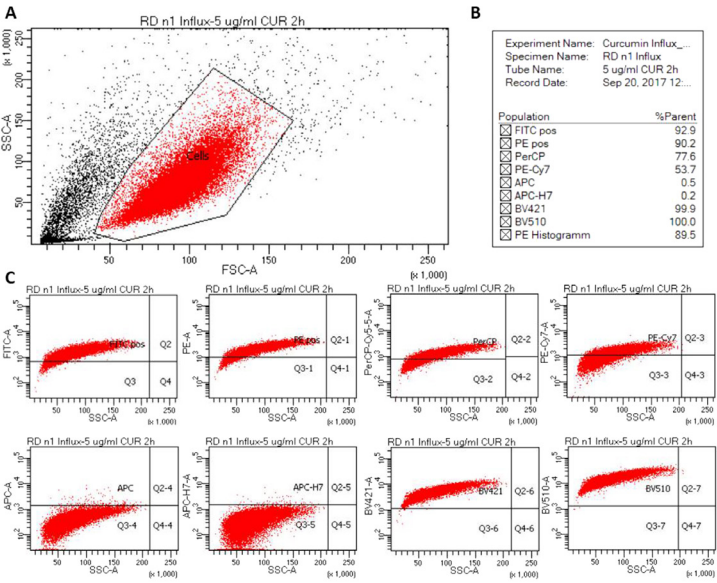

Supplement: Supplementary file 1 [file downloadSupplementary]
